# 1 Strain-level identification of bacterial tomato pathogens directly from 2 metagenomic sequences

3  
4 Marco E. Mechan Llontop<sup>1\*</sup>, Parul Sharma<sup>1,2\*</sup>, Marcela Aguilera Flores<sup>1,2\*</sup>, Shu Yang<sup>1</sup>, Jill  
5 Pollock<sup>1,3</sup>, Long Tian<sup>1</sup>, Chenjie Huang<sup>4</sup>, Steve Rideout<sup>1,3</sup>, Lenwood S. Heath<sup>4</sup>, Song Li<sup>1</sup>, Boris A.  
6 Vinatzer<sup>1</sup>

7  
8 <sup>1</sup> School of Plant and Environmental Sciences, Virginia Tech, Blacksburg, VA

9 <sup>2</sup> Graduate program in Genomics, Bioinformatics, and Computational Biology, Virginia Tech,  
10 Blacksburg, VA

11 <sup>3</sup> Virginia Tech Eastern Shore Agricultural Research and Extension Center, Painter, VA, USA

12 <sup>4</sup> Department of Computer Sciences, Virginia Tech, Blacksburg, VA

13  
14 \*These authors contributed equally

15  
16 Corresponding authors: Boris A. Vinatzer and Song Li

17 E-mail addresses: [vinatzer@vt.edu](mailto:vinatzer@vt.edu) [songli@vt.edu](mailto:songli@vt.edu)

18 Phone number: +1 540 231 2126

19 B.A. Vinatzer ORCID: 0000-0003-4612-225X

## 20 21 Abstract

22 Routine strain-level identification of plant pathogens directly from symptomatic tissue could  
23 significantly improve plant disease control and prevention. Here we tested the Oxford Nanopore  
24 Technologies (ONT) MinION™ sequencer for metagenomic sequencing of tomato plants either  
25 artificially inoculated with a known strain of the bacterial speck pathogen *Pseudomonas*  
26 *syringae* pv. *tomato* (*Pto*), or collected in the field and showing bacterial spot symptoms caused  
27 by either one of four *Xanthomonas* species. After species-level identification using ONT's WIMP  
28 software and the third party tools Sourmash and MetaMaps, we used Sourmash and MetaMaps  
29 with a custom database of representative genomes of bacterial tomato pathogens to attempt  
30 strain-level identification. In parallel, each metagenome was assembled and the longest contigs  
31 were used as query with the genome-based microbial identification Web service LINbase. Both  
32 the read-based and assembly-based approaches correctly identified *Pto* strain T1 in the  
33 artificially inoculated samples. The pathogen strain in most field samples was identified as a  
34 member of *Xanthomonas perforans* group 2. This result was confirmed by whole genome  
35 sequencing of colonies isolated from one of the samples. Although in our case, metagenome-  
36 based pathogen identification at the strain-level was achieved, caution still needs to be exerted  
37 when interpreting strain-level results because of the challenges inherent to assigning reads to  
38 specific strains and the error rate of nanopore sequencing.

## 39 40 Introduction

41 Early detection of plant disease outbreaks and accurate plant disease diagnosis are  
42 prerequisites of efficient plant disease control and prevention (Tinivella et al. 2008). In many  
43 cases, an experienced plant pathologist can quickly diagnose a disease based on symptoms.  
44 However, visual diagnosis does not identify the causative agent at the strain-level. For example,  
45 three different strains of the plant pathogen *Pseudomonas syringae* pathovar (pv.) *tomato* (*Pto*)  
46 cause indistinguishable bacterial speck disease symptoms in tomato (Cai et al. 2011).  
47 Sometimes, visual diagnosis cannot even identify a pathogen at the species level. For example,  
48 four different species of the genus *Xanthomonas* cause indistinguishable bacterial spot disease  
49 symptoms on tomato (*Solanum lycopersicum*) leaves (Jones et al. 2004). Note that in this  
50 article, we use the term "strain" as an intraspecific, monophyletic group of bacteria, which have

51 a very recent common ancestor and are thus genotypically and phenotypically more similar to  
52 each other than to other members of the same species (Dijkshoorn et al. 2000). To avoid  
53 confusion, we use the term “isolate” instead of “strain” when referring to a pure culture of  
54 bacteria isolated on a specified date at a specified geographic location from a specific plant.

55 While most disease control measures may be the same for different pathogen strains or  
56 species, depending on the precise identity of the pathogen, additional control measures may  
57 need to be undertaken. For example, different strains of the same pathogen species may have  
58 different host ranges. Therefore, it may be necessary to avoid certain crop rotations or to  
59 eliminate certain weeds depending on the identity of the strain that causes a disease and its  
60 specific host range. In the case of *Pto*, strain T1 causes disease only in tomato while strain  
61 DC3000 causes disease in tomato and in leafy greens of the family *Brassicaceae* (Yan et al.  
62 2008). Strain DC3000 could thus spread from tomato fields to leafy green fields, cause disease  
63 in a leafy green planted after tomato, and/or survive in weeds that belong to the *Brassicaceae*  
64 family. In other cases, identifying a pathogen to strain level could even trigger eradication  
65 procedures to stop further spread of the disease. For example, this would happen if the select  
66 agent *Ralstonia solanacearum* Race 3 Biovar 2 were to be identified as the causative agent of  
67 bacterial wilt disease outbreak in the USA (Williamson et al. 2002). Fast strain-level plant  
68 pathogen identification would thus add significant value to plant disease diagnostics.

69 Many molecular tools have been developed over the years for pathogen identification.  
70 They all have their strengths and weaknesses (Fang and Ramasamy 2015). Many of them  
71 depend on a pure pathogen culture and thus require lengthy procedures to isolate and culture  
72 the pathogen from the plant tissue. Moreover, many of them cannot identify pathogens at the  
73 strain level. Gene sequence-based techniques, such as multilocus sequence typing/analysis  
74 (MLST/A) (Almeida et al. 2010), can identify a pathogen to strain-level but usually require pure  
75 cultures. Moreover, gene sequence-based techniques depend on previous species-level  
76 identification because different species require different primers to amplify the genes to be  
77 sequenced by polymerase chain reaction (PCR), for example see (Rees-George et al. 2010).  
78 One alternative gene-based method is to amplify the 16S rRNA gene directly from DNA  
79 extracted from plant tissue and to identify the putative pathogen based on its 16S rRNA  
80 sequence. We have recently tested this method but not found it to be suitable because of its low  
81 resolution (Mechan-Llontop et al. 2019).

82 Whole genome sequencing (WGS) does not require PCR and strain-level identification is  
83 now routine practice in the surveillance of food-borne pathogen outbreaks in several countries  
84 (Nadon et al. 2017). With the drop in sequencing cost and development of genome databases  
85 that contain strain-level classification of plant pathogens, WGS now represents a real possibility  
86 in plant disease diagnostics. For example, LINbase at [linbase.org](http://linbase.org) (Tian et al. 2019) contains  
87 precise genome-based circumscriptions for many bacterial plant pathogens from the genus level  
88 to the strain level. Genome sequences of unknown isolates can be identified as members of  
89 circumscribed plant pathogens based on how similar they are at the whole genome level,  
90 measured as Average Nucleotide Identity (ANI) (Konstantinidis and Tiedje 2005), to the other  
91 members of these taxa. However, the limitation of WGS is its dependence on pure cultures.

92 Metagenomic sequencing consists in extracting DNA directly from plant tissue followed  
93 by sequencing all DNA present in the sample. Compared to WGS, the two main advantages of  
94 this approach are that (1) it is much faster because it does not require lengthy pathogen  
95 isolation and culturing procedures; and (2) it does not require much prior knowledge about the  
96 pathogen since any pathogen, besides RNA viruses, can be detected with this method.  
97 However, the main challenge of this approach is that the obtained DNA sequences also contain  
98 host plant sequences and microbe sequences that do not belong to the pathogen. Therefore,  
99 obtaining sufficient sequences of the causative agent and identifying the causative agent among  
100 all the other potential causative agents present in the same plant requires optimized

101 experimental methods for DNA extraction and sequencing and optimized algorithms and  
102 genome databases for precise pathogen identification.

103 The sequencing method that is currently most attractive for metagenomics-based  
104 pathogen identification is nanopore sequencing with the Oxford Nanopore Technologies (ONT)  
105 MinION™ device (Jain et al. 2016). The main strengths of this method are that (1) DNA can be  
106 prepared for sequencing with relatively short protocols (from a few hours to less than an hour;  
107 <https://community.nanoporetech.com>), (2) the MinION™ sequencer is not much larger than a  
108 USB stick and can be used with a desktop or a laptop computer in the lab or even in the field,  
109 (3) it provides the first sequencing results within minutes from the start of a sequencing run, and  
110 (4) the output can reach over 10 gigabases of DNA sequences (more than 1000 times the size  
111 of an individual bacterial genomes) after 48 hours (MinION brochure 2019a). However, the  
112 major weaknesses are (1) the high sequencing error rate of approximately 10% (Tedersoo et al.  
113 2019; Loit et al. 2019) and (2) that the sequencing hardware only works once at full capacity  
114 limiting reuse (MinION brochure 2019b).

115 Metagenomic sequencing with the MinION™ has already been used on several crops for  
116 identification of various pathogens (Chalupowicz et al. 2019) using ONT's software WIMP (Juil  
117 et al. 2015) and on wheat to identify various fungal pathogens (Hu et al. 2019) using the  
118 sequence alignment tool BLASTN (Camacho et al. 2009) in combination with custom  
119 databases. The MinION™ has also been used for plant pathogen detection and identification  
120 starting from extracted RNA or DNA in combination with general or specific primers to increase  
121 the quantity of input for the MinION™ (Loit et al. 2019; Badial et al. 2018). However, in none of  
122 these studies, was strain-level identification attempted directly from sequencing metagenomic  
123 DNA without prior amplification.

124 Here we tested the MinION™ with tomato plants artificially inoculated with different  
125 strains of *Pseudomonas syringae*, including isolates of the *Pto* strains T1 and DC3000 (Cai et  
126 al. 2011), and with plants from tomato fields showing symptoms of natural infection with  
127 bacterial spot for which we did not know the *Xanthomonas* species that caused the infection.  
128 We then explored the precision of identification that can be achieved when using ONT's WIMP  
129 software, Sourmash (Brown and Irber 2016), and MetaMaps (Dilthey et al. 2019) in combination  
130 with default and custom reference databases. We also assembled metagenomic sequences into  
131 contigs and identified contigs in combination with BLASTN (Camacho et al. 2009) and in  
132 combination with the LINbase Web service for genome-based microbial identification (Tian et al.  
133 2019).

134

## 135 **Materials and Methods**

### 136 **Laboratory-infected tomato plants**

137 Seeds of tomato (*Solanum lycopersicum*) 'Rio Grande' were germinated in potting mix soil  
138 (Miracle-grow, OH, USA) under laboratory conditions with a long day period (16-h photoperiod)  
139 and infected at 4 weeks of age. *Pto* isolate K40 (belonging to strain T1), *Pto* isolate DC3000  
140 (belonging to strain DC3000) (Cai et al. 2011), *P. syringae* pv. *syringae* B728a (Feil et al. 2005),  
141 and *P. syringae* 642 (Clarke et al. 2010) were grown in King's B solid medium at 28°C for 24  
142 hours. Isolate *Pto* K40 was suspended at a concentration corresponding to an OD600 of 0.001  
143 in 10 mM MgSO<sub>4</sub> for single-strain inoculation. For the mixed-strain inoculation, all four isolates  
144 were suspended at an OD600 of 0.001 in 10 mM MgSO<sub>4</sub> and pooled together in equal amounts  
145 before inoculation. Silwet L-77 was added to bacterial suspensions (0.025% vol/vol) to facilitate  
146 bacterial infection. Plants were placed in ziplock plastic bags for high humidity conditions for 24  
147 hours before inoculation. After plants were spray-inoculated with 10 ml of bacterial suspensions,  
148 they were placed back into the plastic bags for another 24 hours. Plants were processed for  
149 DNA extraction three days later. Inoculation with 10mM MgSO<sub>4</sub> was included as a mock  
150 treatment.

151

## 152 Naturally infected tomato plants

153 Five tomato plants with bacterial spot symptoms, one plant with symptoms of Septoria leaf spot,  
154 and one plant without symptoms were collected on August 10, 2018, on the Eastern Shore of  
155 Virginia (Accomack and Northampton counties) and shipped overnight to the Virginia Tech  
156 campus in Blacksburg, VA, where they were processed for DNA extraction. Another set of  
157 plants with bacterial spot symptoms were collected in May, 2019. Bacteria were isolated from  
158 symptomatic leaves on King's medium B. Plants and plates were shipped to the Virginia Tech  
159 campus overnight where plants and bacterial colonies were processed for DNA extraction.

160

## 161 DNA extraction

162 All plant samples used for DNA extraction are listed in Table 1. DNA extraction was performed  
163 according to (Ottesen et al. 2013) with the following modifications. Briefly, wearing gloves, the  
164 top of each plant sample (6 to 10 leaves from the top with or without stems) was collected using  
165 clippers. The weight of samples was between 5 to 10 grams. After removing all the dirt from the  
166 plant surface by shaking vigorously, each sample was placed in a 6-1/2"x 5-7/8" Ziploc® bag  
167 together with 300 ml sterilized double-distilled water (DDW). Samples were sonicated for 15  
168 minutes using a Branson 1510 Ultrasonic Cleaner. DNA was extracted with DNeasy®  
169 PowerWater® Kit (QIAGEN; Catalog # 14900-50-NF). All steps for DNA extraction were  
170 performed according to the kit's specifications, except that after adding 1 mL of the kit's solution  
171 PW1, the tube was incubated at 65°C for 15 minutes and then vortexed for 20 minutes.

172 DNA from isolated bacteria was extracted with the Gentra® Puregene® Cell and Tissue  
173 Kit (Gentra Systems; Catalog # D5000). All steps for DNA extraction were performed according  
174 to the Gram-negative Bacteria protocol, except that cells were collected in 1 mL of sterilized  
175 DDW in a 1.5 ml microcentrifuge tube for the lysis step. For both extraction procedures, the  
176 concentration and purity of DNA was measured using a Thermo Scientific™ NanoDrop™ One<sup>C</sup>  
177 Spectrophotometer.

178

## 179 DNA library preparation

180 Library preparation was performed according to the '1D Native barcoding genomic DNA  
181 protocols (EXP-NBD104, EXP-NBD114, and SQK-LSK108 or SQK-LSK109) provided by ONT.  
182 Sequencing libraries were prepared using the Ligation Sequencing Kit (ONT Ltd.; SQK-  
183 LSK109). For each run, NEBNext® Ultra™ II End Repair/dA-Tailing Module (New England  
184 Biolabs, Inc.; Catalog # E7546S) was used for DNA repair and end-prep for each sample.  
185 Repaired DNA was cleaned up by 1.5 volumes of AMPure XP beads, washed on a magnetic  
186 rack using freshly made 70% ethanol, and eluted with 25 µL nuclease-free water. 22.5 µL elute  
187 was used for barcoding by mixing with the Blunt/TA Ligase Master Mix (New England Biolabs,  
188 Inc.; Catalog # M0367S) and Native Barcode (Oxford Nanopore Technologies Ltd.; Native  
189 Barcoding Expansion Kit EXP-NBD104), followed by another wash step using 1.5 volumes of  
190 AMPure XP beads, and DNA was eluted in 26 µL nuclease-free water. Equimolar amounts of  
191 barcoded DNA were then pooled into a 1.5 mL microcentrifuge for ligation. Adapter ligation was  
192 performed by mixing the pooled barcoded sample with Adapter Mix (Oxford Nanopore  
193 Technologies Ltd.; SQK-LSK109), NEBNext® Quick Ligation Reaction Buffer (New England  
194 Biolabs, Inc.; Catalog # B6058S) and Quick T4 DNA Ligase (New England Biolabs, Inc.;  
195 Catalog # M2200S). Ligated DNA was cleaned up by one volume of AMPure XP beads, washed  
196 on a magnetic rack using Long Fragment Buffer (Oxford Nanopore Technologies Ltd.; SQK-  
197 LSK109), and eluted with 15 µL Elution Buffer (Oxford Nanopore Technologies Ltd.; SQK-  
198 LSK109).

199 Sequencing reactions were performed independently for each run on a ONT MinION™  
200 flow cell (FLO-MIN106 R9 Version) connected to a Mk1B device (ONT Ltd.; MIN-101B)  
201 operated by the MinKNOW software (latest version available). Each flow cell was primed with  
202 the priming buffer prepared by mixing 30 µL Flush Tether (ONT Ltd.; EXP-FLP001) with a tube

203 of Flush Buffer (ONT Ltd.; EXP-FLP001). 12  $\mu$ L of the final library mixed with Sequencing Buffer  
204 (ONT Ltd.; SQK-LSK109) and Library Loading Beads (ONT Ltd.; SQK-LSK109) was loaded  
205 onto the SpotON sample port of the flow cell in a dropwise fashion. The sequencing run was  
206 stopped after 48 hours.

207

## 208 [Illumina genome sequencing and assembly](#)

209 Genomic DNA from isolated bacteria was used to prepare 350bp insert DNA libraries and  
210 sequence on an Illumina platform PE150 at Novogene Corporation Inc (Sacramento, CA).  
211 FastQC was used to assess the quality of the raw sequencing data (Andrews 2010). Adapter-  
212 trimming was performed using BBduk with the parameters 'k=23, mink=9, hdist=1, ktrim=r,  
213 minlength=100' (Bushnell 2015). Unicycler v0.4.7 with default parameters was used to *de novo*  
214 assemble the bacterial genomes (Wick et al. 2017).

215

## 216 [Read-based metagenomic analysis](#)

### 217 *Guppy*

218 For all samples, the Fast5 files containing raw reads were base-called with the base-calling  
219 ONT software Guppy (v3.3.2), which uses neural networks to translate raw signals into DNA  
220 sequences in fastq format (available via <https://community.nanoporetech.com>).

### 221 *What's in my pot? (WIMP)*

222 The ONT workflow WIMP (v2019.7.9), which uses Centrifuge (Kim et al. 2016) to assign  
223 taxonomy to reads in real-time, was used for species level identification in all samples.

### 224 *Sourmash*

225 Sourmash, a command-line tool used for k-mer based taxonomic classification for genomes and  
226 metagenomes, computes MinHash sketches to create signatures of DNA sequences which are  
227 then used to assign taxonomic annotations. The *gather* function in this software was used for  
228 taxonomic classification at the species- and strain-level. For species-level classification, the  
229 default Genbank LCA database (v.2018.03.29, k=31) containing 100,000 microbial genomes  
230 was used. For strain level-classification, a custom library with 245 microbial genomes  
231 representative of tomato plant pathogens and close relatives was used. A complete list of  
232 genomes used in the custom reference library is provided in Supplementary Table 1. For all  
233 samples, signatures were computed at 31 k-mer size (for species level) and 51 k-mer size (for  
234 strain level) and abundance filtering was performed to exclude k-mers with an abundance of 1  
235 (Brown and Irber 2016). Sourmash was run on Virginia Tech's High Performance Computing  
236 system, Advanced Research Computing (ARC), with 32 cores and 128GB memory.

### 237 *MetaMaps*

238 Metamaps (Dilthey et al. 2019) was used for taxonomic classification at the species-level using  
239 the miniSeq+H database, which includes more than 12,000 microbial genomes and is included  
240 with the software package. For strain-level classification, the custom library described above for  
241 Sourmash was used. However, the list of genomes was reduced to 149 to include only those  
242 genomes that had NCBI taxonomy IDs as per a prerequisite for Metamaps. MetaMaps was also  
243 run on Virginia Tech's High Performance Computing system, Advanced Research Computing  
244 (ARC), with 32 cores and 128GB memory.

### 245 *Metagenome-assembled genome analysis*

246 The reads of each metagenome were mapped using minimap2 (Li 2018) with the -x and ava-ont  
247 parameters and then a *de novo* assembly was performed for each metagenome using the long  
248 reads assembler miniasm with default parameters (Li 2016).

### 249 *BLAST*

250 The assemblies of each metagenome were used as input to the command-line version of  
251 BLASTN (Camacho et al. 2009) against the bacterial tomato pathogens custom database  
252 described above and with the parameter of e-value set to less than or equal to 0.01. The top hit  
253 was determined to be the alignment with the longest length for each contig.

254 *LINbase*

255 The longest two contigs in each metagenome were used as input to *LINbase* at [linbase.org](http://linbase.org)  
256 (Tian et al. 2019) with the function “Identify using a genome sequence” to identify the pathogens  
257 at the strain level.

258  
259

## 260 **Results**

### 261 **Read-based pathogen identification after single-strain inoculation in the laboratory**

262 Tomato plants inoculated with *Pto* isolate K40 (strain T1) in the laboratory showed bacterial  
263 speck symptoms four days after inoculation (Figure 1A), at which time DNA was extracted.

264 The quantity and quality of the extracted DNA is listed in Table 2. An entire MinION™  
265 flow cell was used to sequence this sample (called L-K40). Of all the sequencing reads,  
266 1,377,617 reads (approximately 60% of the total number of reads) were base-called after the  
267 run was completed using the guppy software. The base-called reads had a total length of  
268 approximately 4.2 Gigabases (Gbp) with the longest read measuring 66,000 bp (see more  
269 details about reads in Table 1).

270 The base-called reads were used as input to WIMP, which classified 89% of reads as of  
271 bacterial origin. Of these reads, WIMP identified 77.47% as *P. syringae* genomospecies 3, a  
272 genome similarity group of which *Pto* is a member. This genome similarity group was never  
273 validly published as a named species and is thus referred to with the number 3 instead of a  
274 name (Gardan et al. 1999). Also NCBI's taxonomy database (Sayers et al. 2009) includes this  
275 taxon as *P. syringae* genomospecies 3. The next most abundant species were identified as *P.*  
276 *syringae* (9.39%), *P. cerasi* (2.09%), and *P. savastanoi* (1.60%). Figure 2 shows a screenshot of  
277 the WIMP result. The composition analysis is shown in Figure 3A (see Supplementary Table 2  
278 for all relative abundance values for all composition analyses shown in Figure 3 and 4).

279 Next, the reads were used as input for composition analysis using Sourmash (Brown  
280 and Irber 2016) and MetaMaps (Dilthey et al. 2019) using the default reference libraries  
281 provided by these programs. Results are shown in Figure 3A. Sourmash identified 56.84% of  
282 the reads as *P. syringae* genomospecies 3 while MetaMaps identified over 91.53% of the reads  
283 as *P. syringae* genomospecies 3. Similarly to WIMP, both programs identified *P. syringae* as the  
284 next most abundant species (14.41% and 4.17%, respectively). All other species were found at  
285 a relative abundance of 2% or below. Therefore, WIMP, MetaMaps, and Sourmash all correctly  
286 identified the pathogen used in the inoculation as a member of *P. syringae* genomospecies 3.  
287 Supplementary Table 3 reports the run times for the three tools for this sample.

288 In an attempt to reach strain level resolution (not that WIMP is limited to species-level  
289 identification), we built Sourmash and MetaMaps custom reference libraries consisting of  
290 genome sequences of representative bacterial tomato pathogen isolates and closely related  
291 isolates that do not cause disease on tomato. The libraries included multiple isolates of the *Pto*  
292 strains DC3000 and T1 (Supplementary Table 2). When using these custom libraries, Sourmash  
293 identified 71.64% of the sequences in the sample as *Pto* isolate T1 (the isolate after which strain  
294 T1 is named) and the remaining sequences as other *P. syringae* isolates that are not pathogens  
295 of tomato (Table 2). Only 0.9% of the sequences were misidentified as *Pto* DC3000. MetaMaps  
296 in combination with the same custom library identified 70.93% as *Pto* isolate T1, 15.90% as *Pto*  
297 isolate NCPPB1108 (another isolate belonging to strain T1), and 7.81% as *Pto* isolate DC3000.  
298 Therefore, both Sourmash and MetaMaps identified most of the reads correctly as an isolate  
299 belonging to *Pto* strain T1 but Metamaps misidentified many more reads as *Pto* strain DC300  
300 compared to Sourmash.

301

### 302 **Read-based pathogen identification after multi-strain inoculation in the laboratory**

303 Next, we wanted to test the bioinformatics pipelines established with the single-strain inoculation  
304 by using a mixed inoculum consisting of the *Pto* isolate K40 (strain T1) and the *Pto* isolate

305 DC3000 (strain DC3000) of *P. syringae* genomospecies 3 together with two additional isolates  
306 of the species *P. syringae* that do not cause disease on tomato: the bean pathogenic isolate  
307 *Psy* B728a and the non-pathogenic isolate *Psy* 642. DNA was again extracted on day four after  
308 inoculation and sequenced on an entire flow cell. All details for this sample (called L-mix) are  
309 listed in Table 1. Approximately 1 million reads of a total length of 4.2 Gbp were obtained with  
310 the longest read measuring 67,000 bp. Since this time 100% of reads were base-called, the  
311 number of base-called reads and the total length of reads were very similar to the single strain  
312 inoculation sample.

313 The caveat with this sample is that we did not know the relative abundance of the 4  
314 isolates in the sample. However, since *Pto* isolates T1 and DC3000 are tomato pathogens while  
315 *Psy* isolates B728a and 642 are not, we expected that most sequences would be identified  
316 again as *P. syringae* genomospecies 3. In fact, WIMP identified 79.61% of all bacterial  
317 sequences (which constituted 95% of all reads) as *P. syringae* genomospecies 3 (Figure 3B),  
318 similar to the 77.47% identified in the single-strain inoculation sample. Compared to WIMP,  
319 Sourmash and MetaMaps showed the same trend as with the single strain inoculation sample:  
320 Sourmash found a lower relative abundance of *P. syringae* genomospecies 3 (43.24%)  
321 compared to WIMP and MetaMaps found a higher relative abundance compared to WIMP  
322 (91.09%) (Figure 3B).

323 Since both *Psy* isolates used in the inoculation belong to the species *P. syringae*, we  
324 expected a slightly higher relative abundance of *P. syringae* compared to the single strain  
325 inoculation sample. Interestingly, this expectation came true for Sourmash (36.87% versus  
326 14.4%) but for WIMP and MetaMaps the relative abundance of *P. syringae* only increased  
327 marginally from 9.38% to 10.01% and from 4.17% to 5.39%, respectively (Figure 3B).

328 We then used the custom reference libraries of representative tomato pathogens to see  
329 if Sourmash and MetaMaps could distinguish isolate K40 (of strain T1) from isolate DC3000 (of  
330 strain DC3000). Sourmash did identify isolate T1 of strain T1 at a relative abundance of 65.98%  
331 and isolate DC3000 of strain DC3000 at a relative abundance of 16.01% (Table 2) while  
332 MetaMaps identified 84.71% of the reads as isolates that belong to strain T1 and 5.61% as  
333 isolate DC3000 (not shown in Table 2 since only the top three hits are shown for each sample).

334 Since we did not know the correct relative abundances of strains in this inoculated plant  
335 sample and could thus not determine how accurate the results were, we decided to sequence  
336 an additional sample (called L-culture-mix) that consisted of DNA extracted from an equal  
337 mixture of the same four strains after they were grown separately overnight in liquid culture.  
338 Approximately 54,000 reads of a total length of 150 Mbp were obtained on 1/6th of a flow cell  
339 with the longest read measuring 76,000 bp. WIMP classified 95% of the reads as bacterial.  
340 WIMP, MetaMaps, and Sourmash identified both, *P. syringae* and *P. syringae* genomospecies 3  
341 in this sample, which we expected to be present at 50% each. WIMP over-estimated *P. syringae*  
342 compared to *P. syringae* genomospecies 3 (56% compared to 28%) and identified some other  
343 species at low relative abundance (Figure 3C). Metamaps also overestimated *P. syringae*  
344 compared to *P. syringae* genomospecies 3: 65.58% vs 32.19%. Sourmash came the closest to  
345 the expected 1 to 1 ratio finding 52.20% of *P. syringae* and 41.68% of *P. syringae*  
346 genomospecies 3 (Figure 3C). When using the custom reference libraries of tomato pathogens  
347 with MetaMaps and Sourmash, MetaMaps outperformed Sourmash since it identified DC3000  
348 and T1 close to the expected 25% abundance: 38.89% and 27.48%, respectively (Table 2).  
349 Sourmash instead assigned a much higher abundance to strain DC3000 (75.1%) compared to  
350 strain T1 (19.63%) (Table 2).

351 Finally, we sequenced a tomato plant grown in the lab that was not inoculated with any  
352 pathogen (called sample L-mock). Since the DNA concentration of this sample was very low,  
353 only approximately 82,000 base-called reads were obtained on 1/7th of a flow cell with a total  
354 length of 103 Mb. The longest read was only 19,000 bp long. Only 8% of the reads were  
355 classified as bacterial showing that this lab-grown plant was not colonized by many bacteria,

356 which was probably also the reason for the low DNA concentration. WIMP, Sourmash, and  
357 Metamaps provided very different results for this sample (Figure 3D). Importantly, as expected  
358 from a non-inoculated plant, none of the reads were identified by either of the three tools as *P.*  
359 *syringae* or *P. syringae* genomospecies 3.

360

### 361 Read-based pathogen identification in naturally infected tomato field samples

362 After obtaining promising results in regard to strain-level identification with laboratory samples,  
363 we used DNA extracted from tomato field samples that were collected on the Eastern Shore of  
364 Virginia to test our pipelines with naturally infected plants (Table 1). The samples came from  
365 tomato plants that either showed symptoms of bacterial spot (samples F1-bs, F2-bs, F4-bs, F7-  
366 bs, F8-bs; see Figure 1B), symptoms of the fungal disease *Septoria* leaf spot (sample F5-  
367 *Septoria*) or no signs of any disease (F6-healthy). We also obtained one sample (F3-bs) with  
368 symptoms of bacterial spot but colonies that had been obtained from culturing bacteria from this  
369 plant had been found to be a mixture of colonies identified as either *Pseudomonas* or  
370 *Xanthomonas*.

371 DNA from all tomato field samples were barcoded and sequenced together with other  
372 samples by multiplexing them on the same flow cell. Therefore, the number of reads (between  
373 35,923 for samples F6-healthy and 137,497 for F1-bs) and total read length (between 66  
374 megabases (Mb) for F6-healthy and 588 Mb for F1-bs) for these samples were much lower  
375 compared to the laboratory samples (Table 1).

376 Detailed results for all samples are reported in Figure 4. Similarly to the lab-inoculated  
377 samples, the majority of reads in the field samples that had symptoms of bacterial disease were  
378 classified as bacteria by WIMP (between 78 and 81%). Importantly, WIMP and Sourmash  
379 agreed that *X. perforans* was the species with the highest relative abundance in these samples  
380 (between 25.82% and 56.44% for WIMP and between 18.51 and 66.01% for Sourmash)  
381 suggesting that *X. perforans* was the causative agent. Sample F3-bs, which had a mixed  
382 *Xanthomonas/Pseudomonas* infection based on culturing, was found by both WIMP and  
383 Sourmash to still be dominated by *X. perforans* (21.98% and 19.55% respectively) followed by  
384 either *P. oryzae* (10.11%) and *P. fluorescens* (5.09%) based on WIMP or *P. putida*  
385 (16.98%) based on Sourmash. Therefore, the presence of a mixed infection was confirmed by  
386 both tools.

387 In contrast to the results from WIMP and Sourmash, MetaMaps identified *X.*  
388 *euvesicatoria* and *X. alfalfae* instead of *X. perforans* as the two species with the highest relative  
389 abundance in all samples with bacterial spot symptoms. This is because *X. perforans* was  
390 missing from the MetaMaps reference library.

391 Interestingly, even the non-symptomatic tomato sample (F6-healthy) was found to  
392 include *X. perforans* as the species with the highest relative abundance based on WIMP and  
393 Sourmash. However, the relative abundance values were lower (6.89% and 18.54%,  
394 respectively). This suggests that this plant might have been infected with *X. perforans* but was  
395 asymptomatic because of lower bacterial titer. This non-symptomatic sample also included a  
396 number of species at relatively high abundance that were rarely found in the samples with  
397 bacterial spot symptoms, for example, *P. oleovorans*, *Sphingomonas parapaucimobilis*,  
398 *Microbacterium* sp. Leaf203, and *Methylobacterium populi*.

399 The sample with *Septoria* leaf spot symptoms (F5-*Septoria*), probably infected by the  
400 plant pathogenic fungus *Septoria lycopersici*, carried a diverse bacterial population consisting of  
401 species in the genera *Pseudomonas*, *Xanthomonas*, *Pantoea*, *Curtobacterium*,  
402 *Methylobacterium*, and *Sphingomonas*. No species in the fungal genus *Septoria* was included in  
403 any of the reference libraries and was thus not identified by any of the programs.

404 When we switched to Sourmash and MetaMaps using our custom database of  
405 representative bacterial tomato pathogens as reference libraries, *X. perforans* isolates TB9,  
406 TB15, and Xp9-5 were identified as the top hits in all plants with bacterial spot symptoms with



407 the exception of F3-bs, which had the mixed *Pseudomonas/Xanthomonas* infection. In this  
408 sample, isolate Xp17-12 was identified by both Sourmash and MetaMaps as top hit.  
409 Interestingly, isolates TB9, TB15, and Xp9-5 are all members of the same intraspecific group, *X.*  
410 *perforans* group 2, based on core genome phylogeny (Schwartz et al. 2015), suggesting that the  
411 *X. perforans* strain infecting the tomatoes with bacterial spot symptoms on the Eastern Shore of  
412 Virginia was also a member of *X. perforans* group 2.

413 For sample F8-bs, we also isolated *Xanthomonas* bacteria to compare the results from the  
414 culture-independent read-based metagenomic approach with a culture-dependent genomic  
415 approach. DNA was extracted from two colonies and sequenced using Illumina HiSeq. The two  
416 genome sequences were assembled into 87 and 86 contigs, respectively, with a total length of  
417 5,340,265 bp and 5,339,287 bp. We used the LINbase Web service for genome-based microbial  
418 identification and found isolate GEV1063 to be the best match for both genomes with 99.98%  
419 ANI and both genomes were identified by LINbase as members of *X. perforans* group 2, which  
420 is circumscribed in LINbase as an intraspecific taxon. Therefore, the culture-dependent  
421 genome-based identification confirmed the culture-independent read-based strain-level  
422 identification of *X. perforans* group 2 as the causative agent in sample F8-bs.

423

#### 424 Metagenome assembly-based pathogen identification

425 In parallel to the read-based pipelines described above, we also assembled each metagenomic  
426 sample using all reads that had a minimum length of 1,000 bp and that were identified by WIMP  
427 as bacterial. The results are summarized in Table 3. The non-inoculated tomato sample from  
428 the lab (L-mock), the healthy tomato sample from the field (F6-healthy), and the sample of the  
429 tomato plant with Septoria leaf spot (F5-Septoria) had the lowest number of contigs (between 4  
430 and 9) with the shortest total length of contigs (between 21,390 bp and 122,956 bp). This was  
431 probably a result of the low number of bacterial reads in these samples (Table 1).

432 The samples with symptoms of either bacterial speck or bacterial spot had a wide range  
433 in contig number and in the total length of contigs ranging from 10 to 131 contigs of a total  
434 length from 5.2 to 12.5Mbp. For our goal of identifying the causative agent in each symptomatic  
435 plant to strain level, we focused on the longest contigs in each sample since these contigs were  
436 the most likely to be of the causative pathogenic agents. It was very promising to see that in  
437 some of the symptomatic samples the longest contig was of a size similar to an entire bacterial  
438 genome, for example, 6.08Mbp in the tomato lab sample inoculated with *Pto* isolate K40 (L-  
439 K40), and 5.03Mbp for the field sample F7-bs showing bacterial spot symptoms (Table 3). We  
440 then used the genome alignment tool MUMmer (Marçais et al. 2018) to determine how much of  
441 the published genome sequences these contigs covered. We found that in the case of sample  
442 L-K40, the longest contig aligned with 93.92% of the published genome sequence of isolate  
443 K40. For F7-bis, the longest contig aligned with 95.52% of the published *X. perforans* genome  
444 of Xp8-16.

445 To obtain a preliminary identification of all contigs we used BLASTN (Camacho et al.  
446 2009) in combination with our custom tomato pathogen database. The results were mostly in  
447 agreement with the reads-based analysis at the species level (Figure 5) but *X. euvesicatoria*  
448 was identified as species instead of *X. perforans* in some of the samples with bacterial spot.

449 To attempt identification of the longest contigs to strain level, we used these contigs as  
450 queries with the “Identify using a genome sequence” function in the LINbase Web service (Tian  
451 et al. 2019). Table 4 lists the results that were obtained for the longest two contigs (separately  
452 and merged) for each sample. When using the longest contig of the tomato plant inoculated with  
453 isolate K40 (of *Pto* strain T1), the *Pto* strain T1 isolate BAV1020 was the best hit but only with  
454 an ANI of 92.76% compared to the query sequence. However, based on a direct genome  
455 sequence comparison, the two genomes are over 99.75% identical to each other. Since we  
456 know that isolate K40 was used as inoculum, the discrepancy between the two ANI value is  
457 necessarily a result of the high error rate of the MinION™ sequencer.

458 For the tomato plant inoculated with the four-strain mix, the longest contig was again  
459 identified as *Pto* strain T1 based on the best hit to *Pto* isolate T1 with an ANI value of 92.73%.  
460 No contig of significant length was identified as *Pto* isolate DC3000. Since the genomes of *Pto*  
461 isolates DC3000 and T1 are over 98.5% identical to each other, the longest contig of this  
462 sample was probably assembled from a combination of DC3000 and T1 reads, which could not  
463 be distinguished from each other also because of the high error rate of the MinION™  
464 sequencer.

465 For the longest contigs in the tomato field samples that showed bacterial spot  
466 symptoms, different isolates of *X. perforans* were the best hits: Xp8-16, Xp10-13, GEV1063,  
467 and GEV2116 (Table 4). These isolates belong to *X. perforans* group 2 (Schwartz et al. 2015)  
468 and are thus in line with the read-based results described above. Only the second-longest  
469 contig in sample F2-bs and the two longest contigs in sample F4-bs contradicted the read-  
470 based results: *X. perforans* isolate 91-118, a member of *X. perforans* group 1B (Schwartz et al.  
471 2015), was the best hit for these contigs.

472 Since for sample F8-bs we also had the genome sequences of the two cultured isolates  
473 (see previous section), we could again directly compare the metagenomic assembly-based  
474 approach with the culture-dependent genomic approach. Although there was no difference in  
475 the identification results themselves since the best matches in LINbase for both approaches  
476 were isolates of *X. perforans* group 2, the ANI between the longest contig of F8-bs and the most  
477 similar genome in LINbase was only 93.35% while the ANI between the genome sequences of  
478 the isolated colonies and their most similar genome in LINbase was 99.98%. As with the lab-  
479 inoculated sample L-K40, this difference in ANI was probably again due to the high error rate of  
480 the MinION™ and was the reason we could not directly identify the causative agent as a  
481 member of *X. perforans* group 2.

## 482 483 Discussion

484 Sensitive detection and precise identification of pathogens in real time directly from symptomatic  
485 organisms, or even better from infected but still asymptomatic organisms, without the need for  
486 pathogen isolation and culturing, is the ultimate goal in control and prevention of infectious  
487 diseases of humans, animals, and plants.

488 As a step towards this goal in plant pathology, here we used the ONT MinION™ for  
489 precise identification of two bacterial tomato pathogens by sequencing metagenomic DNA  
490 directly extracted from symptomatic plants and analyzing the obtained sequences with a set of  
491 different tools and databases. However, we neither attempted to maximize sensitivity of  
492 detection nor to minimize the time necessary for identification.

493 Several other reports describing the use of the MinION™ in culture-independent  
494 metagenomic DNA sequencing for plant pathogen identification have recently been published.  
495 Most of these reports either focused on species-level identification (Hu et al. 2019) and/or on  
496 accelerating the identification protocol (Loit et al. 2019). Only one report focused on strain-level  
497 identification but after polymerase chain reaction with primers specific to loci of a single  
498 pathogen species, which increased the sensitivity of detection and resolution of identification but  
499 restricts the approach to a single pathogen species at the time (Radhakrishnan et al. 2019). Our  
500 goal instead was to develop an experimental and bioinformatics pipeline that can be used for  
501 any bacterial plant pathogen, and, with modifications, possibly for fungal and oomycete  
502 pathogens as well.

503 The first critical step in metagenomic-based pathogen identification is DNA extraction.  
504 There are mainly two possibilities: extracting DNA directly from plant tissue or extracting DNA  
505 from water used to wash the plant (after sonication to help dislocate the pathogen from the  
506 tissue). The first approach has the advantage that large quantities of high-quality DNA can be  
507 extracted. The obvious disadvantage is that a large fraction of the extracted DNA is plant DNA.  
508 The second approach is the approach we decided to use since it is widely used for plant

509 microbiome analysis, for example (Ottesen et al. 2013). Based on the results from our DNA  
510 sequence analysis, this approach allowed us to obtain DNA that was over 80% of bacterial  
511 origin for the naturally infected tomato field samples and over 90% of bacterial origin for the  
512 artificially inoculated tomato plants grown in the laboratory. This value was as high as the  
513 fraction of bacterial DNA when extracting DNA directly from a bacterial culture. Therefore, we  
514 conclude that for metagenome-based identification of bacterial foliar pathogens in symptomatic  
515 plant tissue extracting DNA from wash water after sonication is an excellent solution.  
516 Importantly, even the wash water of our healthy field sample still contained 30% of bacterial  
517 DNA, making this approach possibly still a good choice even for asymptomatic leaves with  
518 relatively low bacterial titers.

519 Because in this project we were not interested in speed, we used the slower, higher  
520 yielding DNA sequencing library preparation protocol, as suggested by ONT, without significant  
521 modifications. Also for the sequencing protocol itself, we followed ONT's instructions without  
522 modifications. The first critical step after sequencing the DNA, is base-calling, which is the  
523 process of translating the raw electrical signals measured by the MinION™ into nucleotide  
524 sequences. Since base-calling is computationally intensive and takes longer than sequencing  
525 itself, base-calling needed to be completed after the sequencing runs themselves were  
526 completed. We used the ONT Guppy base-calling tool without any polishing.

527 The actual assignment of sequencing reads to specific bacterial species and strains was  
528 done using a total of five tools: 1. ONT's WIMP software with graphical user interface, which is  
529 intuitive to use and uses the software Centrifuge (Kim et al. 2016) to rapidly identify and assign  
530 taxonomy to the reads coming from the sequencing base calling in real-time, 2. the command-  
531 line tool Sourmash (Brown and Irber 2016) that computes hash sketches from DNA sequences  
532 and includes k-mer based taxonomic classification for genomic and metagenomic analysis, 3.  
533 the command line tool MetaMaps (Dilthey et al. 2019) which uses approximate mapping  
534 algorithm to map long-read metagenomic sequences to comprehensive databases, 4. the  
535 command line version of BLASTN (Camacho et al. 2009) was used to speed up the  
536 identification of pathogens after metagenome assembly with a custom-built database, 5.  
537 assembly of metagenomes obtained by minimap2 and miniasm (Li 2016) followed by taxonomy  
538 assignment of the two longest contigs obtained by LINbase (Tian et al. 2019) . Moreover,  
539 Sourmash and MetaMaps were used both with default and custom libraries.

540 For species-level identification, the three read-based tools performed similarly well with  
541 the lab samples in regard to accuracy with Sourmash coming the closest to the expected 1 : 1  
542 ratio of *P. syringae* genomospecies 3 : *P. syringae* in the sample L-culture-mix. For the field  
543 samples, the absence of *X. perforans* in the MetaMaps default reference library did not allow  
544 MetaMaps to identify *X. perforans* while WIMP and Sourmash performed similarly well. Both  
545 identified *X. perforans* as the most abundant species in all samples with bacterial spot  
546 symptoms.

547 As for run time, only WIMP is set up to provide real-time results starting minutes after  
548 runs are initiated and results are updated as more sequencing reads are base-called. However,  
549 since base-calling cannot keep up with the amount of raw data that is being generated during a  
550 run, WIMP needs to be re-run when base-calling is completed after a run ends in order to  
551 analyze all data. This took over 36 hours for our largest sample, L-K40 (Supplementary Table  
552 3). The advantage is that users do not need any significant local computing resources to do this  
553 since WIMP runs on ONT's cloud. For the same L-K40 sample, it took Sourmash only 35  
554 minutes to calculate the k-mer signature and perform species-level classification while  
555 Metamaps completed the same run in 6-8 hours. Both tools were run on Virginia Tech's ARC  
556 high-performance computing system. Therefore, Sourmash is significantly faster than  
557 MetaMaps and WIMP but still requires significant computing resources.

558 In regard to ease of use, WIMP cannot be beaten because of its intuitive graphical user  
559 interface. Although both Sourmash and Metamaps are command-line tools, Sourmash beats

560 Metamaps because of the extensive tutorials provided on the Sourmash website. The added  
561 ease of making custom reference libraries and adding genomes to existing libraries also makes  
562 Sourmash more user-friendly compared to MetaMaps, which requires NCBI taxIDs (or creation  
563 of custom taxIDs) for all genomes in custom reference libraries.

564 Assembling reads into contigs before identification did not provide any advantages for  
565 species-level identification since species-level identification was successful with read-based  
566 tools and read-based identification is generally faster since it does not require prior assembly of  
567 reads into contigs. However, this advantage of speed may diminish with an increasing number  
568 of reads since mapping of a smaller number of assembled contigs might be faster than mapping  
569 a large number of reads individually.

570 For strain-level identification, WIMP cannot be used since it only reaches species-level  
571 resolution. When comparing MetaMaps with Sourmash, MetaMaps misidentified a larger  
572 number of reads as strain *Pto* DC3000 compared to Sourmash in the single strain inoculation  
573 sample L-K40, which we knew did not contain any DNA of strain *Pto* DC3000. Instead in the  
574 sample L-culture-mix with known equal concentrations, it was Sourmash that overestimated  
575 strain *Pto* DC3000 compared to strain *Pto* T1. For field sample F8-bs for which we had also a  
576 culture-dependent result indicating *X. perforans* group 2 as causative agent, both software  
577 identified the same best hit in the custom database that was also a member of *X. perforans*  
578 group 2. Therefore, we conclude that Sourmash and MetaMaps did equally well in regard to  
579 strain accuracy. In regard to run time, Sourmash's run time increased to 1-3 hours when using a  
580 k-mer size of 51, which is required for strain-level identification. Run time for MetaMaps  
581 decreased to 3-4 hours because of the smaller size of the custom library in comparison to  
582 default databases. However, Sourmash still performed better than MetaMaps in regard to  
583 computation time.

584 The challenge when using either Sourmash or MetaMaps for strain-level identification is  
585 that we had to interpret the results based on prior knowledge of which isolates in our custom  
586 database belonged to which pathogen strain. For example, only by checking Figure 1 in  
587 (Schwartz et al. 2015), were we able to identify the best matches found by Sourmash and  
588 MetaMaps in our custom database as members of *X. perforans* group 2. Moreover, a best  
589 match with an isolate that belongs to a certain strain, or any other group or taxon for that matter,  
590 still does not necessarily mean that the query is a member of the same group as well. To make  
591 such a conclusion, it is necessary to determine (1) the genomic breadth of the group, for  
592 example, 99.75% for *X. perforans* group 2, and (2) the genomic distance of the query to a  
593 representative member of that group with this distance needing to be smaller than the genomic  
594 breadth of the group. Alternatively, a phylogenetic analysis could be performed to determine if  
595 the unknown is a member of the clade that corresponds to the specific group. Because species  
596 have a standard genomic breadth of 95% ANI, WIMP, Sourmash, and Metamaps can infer  
597 species membership from metagenomic reads relatively easily. However, strains (and any other  
598 group smaller than a species) do not have a standard ANI breadth. Therefore, Sourmash and  
599 MetaMaps would need to be given genomic circumscriptions of strains as part of the reference  
600 library information in order to precisely assign reads to strains.

601 Since the MinION™ outputs long reads, we were surprisingly successful in assembling  
602 reads into contigs almost as long as entire bacterial genomes, which could then be used for  
603 genome-based identification. We specifically developed the LINbase Web service for identifying  
604 microbes as members of taxa at any genomic breadth below the rank of genus (Tian et al.  
605 2019) and we had circumscribed both *Pto* strain T1 and *X. perforans* group 2 as taxa in LINbase  
606 with genomic breadths of 99.75% and 99.9% ANI, respectively. Therefore, we should have been  
607 able to avoid the problem that we had with read-based identification. However, the challenge  
608 that arose with this approach was that because of the high error rate of the MinION™, the ANI  
609 between all query contigs and their best matches in LINbase were below 95%. This was true  
610 even for the longest contig in sample L-K40, which had been inoculated with strain *Pto* T1

611 isolate K40. Therefore, the longest contig in this sample should have had an almost 100%  
612 match in LINbase with the genome of isolate K40 and other isolates that belong to strain T1.  
613 However, the ANI between this contig and the best match in LINbase was only 92.76%.  
614 Therefore, using the metagenome-assembled contigs did not allow us to identify the pathogens  
615 as members of the strains circumscribed in LINbase because the MinION™ error rate lowered  
616 the ANI between the query contig and the best match to below the genomic breath of the  
617 circumscribed taxon. Being aware of the high error rate, we were still able to extrapolate from  
618 the best match in LINbase the identity of the correct strain. However, such a result can only be  
619 considered putative or preliminary.

620 In conclusion, using either the Sourmash and MetaMaps tools for read-based strain  
621 identification or LINbase for assembly-based strain-level identification, putative strain-level  
622 identification was possible and was confirmed by culture-dependent genome-based  
623 identification. However, it was impossible to reach high-confidence strain-level identification  
624 because of the absence of appropriate strain-level databases for the read-based tools and  
625 because of the high error rate of the MinION™ when using assembly-based identification.  
626 Considering the large and active user community of the MinION™ sequencer and the continued  
627 development of new versions of the MinION™, we expect improvements in both, tool  
628 development for read-based identification, and improvements in the precision at which the  
629 MinION™ can distinguish nucleotides from each other and/or base-calling algorithms, which  
630 should ultimately lower the currently high error rate. At this point, we consider culture-  
631 independent metagenomic sequencing with the MinION™ an excellent approach to obtain  
632 results when high confidence strain-level identification is not required or when a culture-  
633 dependent genome-based identification is used as a follow-up.

634

### 635 **Author contributions**

636 BAV and SL developed the project. MEML performed most of the wet-lab experiments. MAF  
637 and PS did most of the bioinformatics analyses. SY contributed to the wet-lab experiments. LT  
638 and CH, under supervision from BAV and LSH, developed LINbase. BAV, with contributions  
639 from MEML, MAF, PS, and SL wrote the manuscript. All authors read and approved the final  
640 version of the manuscript.

641

### 642 **Conflict of Interest**

643 LINbase uses the trademarks Life Identification Number® and LIN®, which are registered by This  
644 Genomic Life, Inc. LSH and BAV report in accordance with Virginia Tech policies and  
645 procedures and their ethical obligation as researchers that they have a financial interest in This  
646 Genomic Life, Inc. Therefore, their financial interests may be affected by the research reported  
647 in this manuscript. They have disclosed those interests fully to Virginia Tech, and they have in  
648 place an approved plan for managing any potential conflicts arising from this relationship.

649

### 650 **Funding**

651 This study was supported by the College of Agriculture and Life Sciences at Virginia Polytechnic  
652 Institute and State University and by the National Science Foundation (IOS-1754721). Funding  
653 to BAV and SL was also provided in part by the Virginia Agricultural Experiment Station and the  
654 Hatch Program of the National Institute of Food and Agriculture, US Department of Agriculture.

655

### 656 **Acknowledgements**

657 The authors acknowledge Advanced Research Computing (ARC) at Virginia Tech for providing  
658 computational resources and technical support that have contributed to the results reported  
659 within this paper. URL: <http://www.arc.vt.edu>

660

## 661 Literature cited

- 662 Almeida, N. F., Yan, S., Cai, R., Clarke, C. R., Morris, C. E., Schaad, N. W., et al. 2010.  
663 PAMDB, a multilocus sequence typing and analysis database and website for plant-  
664 associated microbes. *Phytopathology*. 100:208–215.
- 665 Andrews, S. 2010. Babraham bioinformatics-FastQC a quality control tool for high throughput  
666 sequence data. URL: <https://www.bioinformatics.babraham.ac.uk/projects/fastqc/>  
667 <https://www.bioinformatics.babraham.ac.uk/projects/fastqc/>  
668 <https://www.bioinformatics.babraham.ac.uk/projects/fastqc/>.
- 669 Badial, A. B., Sherman, D., Stone, A., Gopakumar, A., Wilson, V., Schneider, W., et al. 2018.  
670 Nanopore Sequencing as a Surveillance Tool for Plant Pathogens in Plant and Insect  
671 Tissues. *Plant Disease*. 102:1648–1652 Available at: [http://dx.doi.org/10.1094/pdis-04-17-](http://dx.doi.org/10.1094/pdis-04-17-0488-re)  
672 [0488-re](http://dx.doi.org/10.1094/pdis-04-17-0488-re).
- 673 Brown, C. T., and Irber, L. 2016. sourmash: a library for MinHash sketching of DNA. *J. Open*  
674 *Source Software*. 1:27.
- 675 Bushnell, B. 2015. BBDMap. Available at: <https://sourceforge.net/projects/bbmap/>.
- 676 Cai, R., Lewis, J., Yan, S., Liu, H., Clarke, C. R., Campanile, F., et al. 2011. The plant pathogen  
677 *Pseudomonas syringae* pv. *tomato* is genetically monomorphic and under strong selection  
678 to evade tomato immunity. *PLoS Pathog*. 7:e1002130.
- 679 Camacho, C., Coulouris, G., Avagyan, V., Ma, N., Papadopoulos, J., Bealer, K., et al. 2009.  
680 BLAST+: architecture and applications. *BMC Bioinformatics*. 10:421.
- 681 Chalupowicz, L., Dombrovsky, A., Gaba, V., Luria, N., Reuven, M., Beerman, A., et al. 2019.  
682 Diagnosis of plant diseases using the Nanopore sequencing platform. *Plant Pathol*. 68:229–  
683 238.
- 684 Clarke, C. R., Cai, R., Studholme, D. J., Guttman, D. S., and Vinatzer, B. A. 2010.  
685 *Pseudomonas syringae* strains naturally lacking the classical *P. syringae* *hrp/hrc* Locus are  
686 common leaf colonizers equipped with an atypical type III secretion system. *Mol. Plant*  
687 *Microbe. Interact*. 23:198–210.
- 688 Dijkshoorn, L., Ursing, B. M., and Ursing, J. B. 2000. Strain, clone and species: comments on  
689 three basic concepts of bacteriology. *J. Med. Microbiol*. 49:397–401.
- 690 Dilthey, A. T., Jain, C., Koren, S., and Phillippy, A. M. 2019. Strain-level metagenomic  
691 assignment and compositional estimation for long reads with MetaMaps. *Nat. Commun*.  
692 10:3066.
- 693 Fang, Y., and Ramasamy, R. P. 2015. Current and Prospective Methods for Plant Disease  
694 Detection. *Biosensors*. 5:537–561.
- 695 Feil, H., Feil, W. S., Chain, P., Larimer, F., DiBartolo, G., Copeland, A., et al. 2005. Comparison  
696 of the complete genome sequences of *Pseudomonas syringae* pv. *syringae* B728a and pv.  
697 *tomato* DC3000. *Proc. Natl. Acad. Sci. U. S. A.* 102:11064–11069.
- 698 Gardan, L., Shafik, H., Belouin, S., Broch, R., Grimont, F., and Grimont, P. A. 1999. DNA  
699 relatedness among the pathovars of *Pseudomonas syringae* and description of  
700 *Pseudomonas tremae* sp. nov. and *Pseudomonas cannabina* sp. nov. (ex Sutic and Dowson  
701 1959). *Int. J. Syst. Bacteriol*. 49 Pt 2:469–478.
- 702 Hu, Y., Green, G. S., Milgate, A. W., Stone, E. A., Rathjen, J. P., and Schwessinger, B. 2019.  
703 Pathogen Detection and Microbiome Analysis of Infected Wheat Using a Portable DNA  
704 Sequencer. *Phytobiomes Journal*. 3:92–101.
- 705 Jain, M., Olsen, H. E., Paten, B., and Akeson, M. 2016. The Oxford Nanopore MinION: delivery  
706 of nanopore sequencing to the genomics community. *Genome Biol*. 17:239.
- 707 Jones, J. B., Lacy, G. H., Bouzar, H., Stall, R. E., and Schaad, N. W. 2004. Reclassification of  
708 the Xanthomonads associated with bacterial spot disease of tomato and pepper. *Syst. Appl.*  
709 *Microbiol*. 27:755–762.
- 710 Juul, S., Izquierdo, F., Hurst, A., Dai, X., Wright, A., Kulesha, E., et al. 2015. What's in my pot?  
711 Real-time species identification on the MinION. *bioRxiv*. :030742.

- 712 Kim, D., Song, L., Breitwieser, F. P., and Salzberg, S. L. 2016. Centrifuge: rapid and sensitive  
713 classification of metagenomic sequences. *Genome Res.* 26:1721–1729.
- 714 Konstantinidis, K. T., and Tiedje, J. M. 2005. Genomic insights that advance the species  
715 definition for prokaryotes. *Proc. Natl. Acad. Sci. U. S. A.* 102:2567–2572.
- 716 Li, H. 2018. Minimap2: pairwise alignment for nucleotide sequences. *Bioinformatics.* 34:3094–  
717 3100.
- 718 Li, H. 2016. Minimap and miniasm: fast mapping and de novo assembly for noisy long  
719 sequences. *Bioinformatics.* 32:2103–2110.
- 720 Loit, K., Adamson, K., Bahram, M., Puusepp, R., Anslan, S., Kiiker, R., et al. 2019. Relative  
721 performance of Oxford Nanopore MinION vs. Pacific Biosciences Sequel third-generation  
722 sequencing platforms in identification of agricultural and forest pathogens. *bioRxiv.* :592972  
723 Available at: <https://www.biorxiv.org/content/10.1101/592972v1.abstract> [Accessed  
724 September 8, 2019].
- 725 Marçais, G., Delcher, A. L., Phillippy, A. M., Coston, R., Salzberg, S. L., and Zimin, A. 2018.  
726 MUMmer4: A fast and versatile genome alignment system. *PLoS Comput. Biol.*  
727 14:e1005944.
- 728 Mechan-Llontop, M. E., Tian, L., Bernal-Galeano, V., Reeves, E., Hansen, M. A., Bush, E., et al.  
729 2019. Assessing the potential of culture-independent 16S rRNA microbiome analysis in  
730 disease diagnostics: the example of *Dianthus gratianopolitanus* and *Robbsia andropogonis*.  
731 *European Journal of Plant Pathology.* Available at: [http://dx.doi.org/10.1007/s10658-019-](http://dx.doi.org/10.1007/s10658-019-01850-8)  
732 01850-8 [Accessed September 16, 2019].
- 733 MinION brochure. 2019a. Oxford Nanopore Technologies. Available at:  
734 <http://nanoporetech.com/resource-centre/minion-brochure> [Accessed September 14, 2019].
- 735 MinION brochure. 2019b. Oxford Nanopore Technologies. Available at:  
736 <http://nanoporetech.com/resource-centre/minion-brochure> [Accessed September 14, 2019].
- 737 Nadon, C., Van Walle, I., Gerner-Smidt, P., Campos, J., Chinen, I., Concepcion-Acevedo, J., et  
738 al. 2017. PulseNet International: Vision for the implementation of whole genome sequencing  
739 (WGS) for global food-borne disease surveillance. *Euro Surveill.* 22 Available at:  
740 <http://dx.doi.org/10.2807/1560-7917.ES.2017.22.23.30544>.
- 741 Ottesen, A. R., González Peña, A., White, J. R., Pettengill, J. B., Li, C., Allard, S., et al. 2013.  
742 Baseline survey of the anatomical microbial ecology of an important food plant: *Solanum*  
743 *lycopersicum* (tomato). *BMC Microbiol.* 13:114.
- 744 Radhakrishnan, G. V., Cook, N. M., Bueno-Sancho, V., Lewis, C. M., Persoons, A., Mitiku, A.  
745 D., et al. 2019. MARPLE, a point-of-care, strain-level disease diagnostics and surveillance  
746 tool for complex fungal pathogens. *BMC Biology.* 17 Available at:  
747 <http://dx.doi.org/10.1186/s12915-019-0684-y>.
- 748 Rees-George, J., Vanneste, J. L., Cornish, D. A., Pushparajah, I. P. S., Yu, J., Templeton, M.  
749 D., et al. 2010. Detection of *Pseudomonas syringae* pv. *actinidiae* using polymerase chain  
750 reaction (PCR) primers based on the 16S-23S rDNA intertranscribed spacer region and  
751 comparison with PCR primers based on other gene regions. *Plant Pathology.* 59:453–464  
752 Available at: <http://dx.doi.org/10.1111/j.1365-3059.2010.02259.x>.
- 753 Sayers, E. W., Barrett, T., Benson, D. A., Bryant, S. H., Canese, K., Chetvernin, V., et al. 2009.  
754 Database resources of the National Center for Biotechnology Information. *Nucleic Acids*  
755 *Res.* 37:D5–15.
- 756 Schwartz, A. R., Potnis, N., Timilsina, S., Wilson, M., PatanÃ©, J., Martins, J., et al. 2015.  
757 Phylogenomics of *Xanthomonas* field strains infecting pepper and tomato reveals diversity in  
758 effector repertoires and identifies determinants of host specificity. *Frontiers in Microbiology.*  
759 6 Available at: <http://dx.doi.org/10.3389/fmicb.2015.00535>.
- 760 Tedersoo, L., Drenkhan, R., Anslan, S., Morales-Rodriguez, C., and Cleary, M. 2019.  
761 High-throughput identification and diagnostics of pathogens and pests: Overview and  
762 practical recommendations. *Molecular Ecology Resources.* 19:47–76 Available at:

- 763 <http://dx.doi.org/10.1111/1755-0998.12959>.
- 764 Tian, L., Huang, C., Heath, L. S., and Vinatzer, B. A. 2019. LINbase: A Web service for  
765 genome-based identification of microbes as members of crowdsourced taxa. bioRxiv.  
766 Available at: <https://www.biorxiv.org/content/10.1101/752212v1.abstract>.
- 767 Tinivella, F., Gullino, M. L., and Stack, J. P. 2008. The Need for Diagnostic Tools and  
768 Infrastructure. In *Crop Biosecurity*, Springer Netherlands, p. 63–71.
- 769 Wick, R. R., Judd, L. M., Gorrie, C. L., and Holt, K. E. 2017. Unicycler: Resolving bacterial  
770 genome assemblies from short and long sequencing reads. PLoS Comput. Biol.  
771 13:e1005595.
- 772 Williamson, L., Nakaho, K., Hudelson, B., and Allen, C. 2002. *Ralstonia solanacearum* Race 3,  
773 Biovar 2 Strains Isolated from Geranium Are Pathogenic on Potato. Plant Dis. 86:987–991.
- 774 Yan, S., Liu, H., Mohr, T. J., Jenrette, J., Chiodini, R., Zaccardelli, M., et al. 2008. Role of  
775 Recombination in the Evolution of the Model Plant Pathogen *Pseudomonas syringae* pv.  
776 *tomato* DC3000, a Very Atypical Tomato Strain. Applied and Environmental Microbiology.  
777 74:3171–3181 Available at: <http://dx.doi.org/10.1128/aem.00180-08>.  
778



779  
780  
781

**Tables**

**Table 1.** Description of samples used in this study.

| Sample Name   | Short description                                                        | DNA concentration of samples (ng/ul) | Fraction of flow cell used | # reads base-called | Total length of reads base-called | % of reads classified as bacteria (based on WIMP) | Mean read length in bp | Max read length in bp | % reads >1000bp |
|---------------|--------------------------------------------------------------------------|--------------------------------------|----------------------------|---------------------|-----------------------------------|---------------------------------------------------|------------------------|-----------------------|-----------------|
| L-K40         | Tomato inoculated with <i>Pto</i> K40 in the laboratory                  | 325.2                                | 1                          | 1,377,617           | 4.18 Gb                           | 89%                                               | 3,037                  | 66,015                | 64%             |
| L-mix         | Tomato inoculated with four <i>P. syringae</i> strains in the laboratory | 450.4                                | 1                          | 1,006,978           | 4.16 Gb                           | 95%                                               | 4,130                  | 67,174                | 74%             |
| L-mock        | Non-inoculated tomato plant grown in the laboratory                      | 33.6                                 | 1/7                        | 82,412              | 103.22 Mb                         | 8%                                                | 1,252                  | 19,754                | 40%             |
| L-culture-mix | Equal mix of 4 <i>P. syringae</i> strains grown in liquid culture        | 147.5                                | 1/6                        | 54,124              | 155.93 Mb                         | 93%                                               | 2,880                  | 76,060                | 39%             |
| F1-bs         | Tomato field sample with symptoms of bacterial spot                      | 562                                  | 1/7                        | 137,497             | 588.50 Mb                         | 81%                                               | 4,280                  | 55,436                | 73%             |
| F2-bs         | Tomato field sample with symptoms of bacterial spot                      | 500.2                                | 1/7                        | 90,185              | 498.68 Mb                         | 80%                                               | 5,529                  | 65,598                | 74%             |
| F3-bs         | Tomato field sample with symptoms of bacterial spot                      | 332.5                                | 1/7                        | 100,956             | 423.16 Mb                         | 78%                                               | 4,191                  | 59,405                | 68%             |
| F4-bs         | Tomato field sample with symptoms of bacterial spot                      | 319.8                                | 1/7                        | 74,615              | 289.36 Mb                         | 81%                                               | 3,878                  | 51,268                | 70%             |

|                 |                                                               |       |     |         |            |     |       |        |     |
|-----------------|---------------------------------------------------------------|-------|-----|---------|------------|-----|-------|--------|-----|
| F5-<br>Septoria | Tomato field sample<br>with symptoms of<br>Septoria leaf spot | 75.8  | 1/7 | 73,432  | 226.721 Mb | 50% | 3,087 | 43,967 | 59% |
| F6-<br>healthy  | Tomato field sample<br>with no symptoms                       | 29.1  | 1/7 | 35,923  | 66,58 Mb   | 31% | 1,853 | 29,617 | 46% |
| F7-bs           | Tomato field sample<br>with symptoms of<br>bacterial spot     | 331.8 | 1/7 | 118,391 | 432.08 Mb  | 75% | 3,649 | 48,335 | 64% |
| F8-bs           | Tomato field sample<br>with symptoms of<br>bacterial spot     | 154.2 | 1/2 | 106,059 | 371.84 Mb  | 70% | 3,505 | 33,472 | 71% |

782  
783

784 **Table 2.** Relative abundance results (top three hits) obtained with MetaMaps and Sourmash  
 785 using a custom genome database of bacterial tomato pathogens and closely related isolates.

| Sample        | rank | MetaMaps                                      | %     | Sourmash                                      | %     |
|---------------|------|-----------------------------------------------|-------|-----------------------------------------------|-------|
| L-K40         | 1    | <i>Pto</i> T1 ( <i>Pto</i> strain T1)         | 70.94 | <i>Pto</i> T1 ( <i>Pto</i> strain T1)         | 71.65 |
|               | 2    | <i>Pto</i> NCPPB1108 ( <i>Pto</i> strain T1)  | 15.91 | <i>P. syringae</i> pv. <i>actinidiae</i>      | 3.67  |
|               | 3    | <i>Pto</i> DC3000 ( <i>Pto</i> strain DC3000) | 7.81  | <i>P. syringae</i>                            | 2.44  |
| L-mix         | 1    | <i>Pto</i> T1 ( <i>Pto</i> strain T1)         | 69.48 | <i>Pto</i> T1 ( <i>Pto</i> strain T1)         | 65.98 |
|               | 2    | <i>Pto</i> NCPPB 1108 ( <i>Pto</i> strain T1) | 15.23 | <i>Pto</i> DC3000 ( <i>Pto</i> strain DC3000) | 16.01 |
|               | 3    | <i>Pto</i> PT23                               | 6.90  | <i>P. syringae</i> pv. <i>actinidiae</i>      | 2.56  |
| L-mock        | 1    | <i>Clavibacter michiganensis</i> <sup>1</sup> | 13.30 | *no matches*                                  |       |
|               | 2    | <i>Xp</i>                                     | 11.39 | *no matches*                                  |       |
|               | 3    | <i>Ralstonia solanacearum</i>                 | 8.86  | *no matches*                                  |       |
| L-culture-mix | 1    | <i>Pto</i> DC3000 ( <i>Pto</i> strain DC3000) | 38.90 | <i>Pto</i> DC300 ( <i>Pto</i> strain DC3000)  | 75.17 |
|               | 2    | <i>Pto</i> T1 ( <i>Pto</i> strain T1)         | 27.48 | <i>Pto</i> T1 ( <i>Pto</i> strain T1)         | 19.63 |
|               | 3    | <i>Pto</i> NCPPB 1108 ( <i>Pto</i> strain T1) | 9.07  | <i>Pto</i> PT23                               | 1.03  |
| F1-bs         | 1    | <i>Xp</i> TB9 ( <i>Xp</i> group 2)            | 29.37 | <i>Xp</i> TB15 ( <i>Xp</i> group 2)           | 95.18 |
|               | 2    | <i>Xp</i> Xp9-5 ( <i>Xp</i> group 2)          | 28.03 | <i>Xp</i> Xp17-12                             | 1.05  |
|               | 3    | <i>Xp</i> Xp7-12                              | 14.97 | <i>X. campestris</i> pv. <i>durantae</i>      | 0.79  |
| F2-bs         | 1    | <i>Xp</i> Xp9-5 ( <i>Xp</i> group 2)          | 15.97 | <i>Xp</i> strain Xp9-5 ( <i>Xp</i> group 2)   | 90.72 |
|               | 2    | <i>Xp</i> TB9 ( <i>Xp</i> group 2)            | 15.14 | <i>Xp</i> strain Xp17-12                      | 4.19  |
|               | 3    | <i>Xp</i> Xp7-12                              | 10.38 | <i>X. arboricola</i> pv. <i>pruni</i>         | 1.83  |
| F3-bs         | 1    | <i>Xp</i> Xp17-12                             | 50.59 | <i>Xp</i> strain Xp17-12                      | 97.76 |
|               | 2    | <i>Xp</i> 91-118                              | 9.00  | <i>Xp</i> strain Xp9-5 ( <i>Xp</i> group 2)   | 1.27  |
|               | 3    | <i>Xp</i> LH3                                 | 4.67  | <i>X. campestris</i> pv. <i>durantae</i>      | 0.98  |
| F4-bs         | 1    | <i>Xp</i> TB9 ( <i>Xp</i> group 2)            | 22.38 | <i>Xp</i> TB15 ( <i>Xp</i> group 2)           | 97.28 |
|               | 2    | <i>Xp</i> Xp9-5 ( <i>Xp</i> group 2)          | 19.30 | <i>Xp</i> Xp9-5 ( <i>Xp</i> group 2)          | 2.11  |
|               | 3    | <i>Xp</i> TB15 ( <i>Xp</i> group 2)           | 18.80 | <i>X. campestris</i> pv. <i>viticola</i>      | 0.61  |
| F5-Septoria   | 1    | <i>X. campestris</i>                          | 30.45 | <i>X. arboricola</i>                          | 57.08 |
|               | 2    | <i>X. arboricola</i>                          | 25.60 | <i>X. arboricola</i>                          | 14.76 |
|               | 3    | <i>X. pisi</i>                                | 2.78  | <i>Xp</i> TB9                                 | 9.59  |
| F6-healthy    | 1    | <i>Xp</i> Xp9-5 ( <i>Xp</i> group 2)          | 11.70 | <i>Xp</i> TB15 ( <i>Xp</i> group 2)           | 98.13 |
|               | 2    | <i>Xp</i> TB9 ( <i>Xp</i> group 2)            | 11.47 | <i>Xp</i> LH3                                 | 1.87  |
|               | 3    | <i>Xp</i> Xp7-12                              | 10.82 | *no matches                                   |       |
| F7-bs         | 1    | <i>Xp</i> TB9 ( <i>Xp</i> group 2)            | 23.40 | <i>Xp</i> TB15 ( <i>Xp</i> group 2)           | 89.80 |
|               | 2    | <i>Xp</i> Xp9-5 ( <i>Xp</i> group 2)          | 19.15 | <i>X. arboricola</i>                          | 5.47  |
|               | 3    | <i>Xp</i> TB15 ( <i>Xp</i> group 2)           | 17.28 | <i>X. campestris</i>                          | 1.54  |
| F8-bs         | 1    | <i>Xp</i> Xp9-5 ( <i>Xp</i> group 2)          | 26.51 | <i>Xp</i> Xp9-5 ( <i>Xp</i> group 2)          | 94.17 |
|               | 2    | <i>Xp</i> TB9 ( <i>Xp</i> group 2)            | 17.48 | <i>Xp</i> TB15 ( <i>Xp</i> group 2)           | 1.62  |
|               | 3    | <i>Xp</i> Xp17-12                             | 15.23 | <i>Xp</i> Xp17-12                             | 1.05  |

786 <sup>1</sup> for non-tomato pathogens only the species is reported

**Table 3.** Description of metagenomic assemblies.

| <b>Sample name</b> | <b>Total number of contigs</b> | <b>Total assembly length in bp</b> | <b>Mean contig length in bp</b> | <b>Longest contig in bp</b> | <b>2nd longest contig in bp</b> |
|--------------------|--------------------------------|------------------------------------|---------------------------------|-----------------------------|---------------------------------|
| L-K40              | 24                             | 6,619,207                          | 275,800                         | 6,081,137                   | 139,929                         |
| L-mix              | 73                             | 8,669,208                          | 118,756                         | 6,126,095                   | 118,770                         |
| L-mock             | 8                              | 117,647                            | 14,705                          | 63,177                      | 12,037                          |
| L-culture-mix      | 20                             | 5,827,276                          | 291,363                         | 764,727                     | 622,920                         |
| F1-bs              | 92                             | 12,529,321                         | 136,188                         | 4,974,348                   | 881,066                         |
| F2-bs              | 131                            | 8,513,800                          | 64,990                          | 4,345,732                   | 276,399                         |
| F3-bs              | 49                             | 11,872,268                         | 242,291                         | 2,275,239                   | 1,170,971                       |
| F4-bs              | 18                             | 5,216,728                          | 289,818                         | 1,172,667                   | 925,913                         |
| F5-Septoria        | 9                              | 122,956                            | 13,661                          | 37,948                      | 25,805                          |
| F6-healthy         | 4                              | 21,390                             | 5,347                           | 8,488                       | 7,900                           |
| F7-bs              | 35                             | 5,666,575                          | 161,902                         | 5,038,472                   | 56,441                          |
| F8-bs              | 10                             | 5,319,638                          | 531,963                         | 2,680,062                   | 2,212,039                       |

788

789

790 **Table 4.** LINbase results for two longest contigs

| Sample        | Longest contig (ANI %)      | Taxon membership of longest contig | Second longest contig (ANI %) | Taxon membership of second longest | Two longest contigs merged (ANI %) | Taxon membership of merged contigs |
|---------------|-----------------------------|------------------------------------|-------------------------------|------------------------------------|------------------------------------|------------------------------------|
| L-K40         | <i>Pto</i> BAV1020 (92.766) | <i>Pto</i> strain T1               | NA                            | NA                                 | <i>Pto</i> BAV1020 (92.761)        | <i>Pto</i> strain T1               |
| L-mix         | <i>Pto</i> BAV1020 (92.731) | <i>Pto</i> strain T1               | NA                            | NA                                 | <i>Pto</i> NYS-T1 (92.769)         | <i>Pto</i> strain T1               |
| L-culture-mix | <i>Ps</i> 642 (93.368)      | <i>Ps</i>                          | <i>Ps</i> UB0390 (93.408)     | <i>Ps</i>                          | <i>Pc</i> ICMP19117 (93.315)       | <i>Pseudomonas</i>                 |
| F1-bs         | <i>Xp</i> Xp10-13 (94.625)  | <i>Xp</i> group 2                  | NA                            | NA                                 | <i>Xp</i> GEV1063 (94.613)         | <i>Xp</i> group 2                  |
| F2-bs         | <i>Xp</i> GEV2117 (94.236)  | <i>Xp</i> group 2                  | <i>Xp</i> 91-118 (94.478)     | <i>Xp</i>                          | <i>Xp</i> GEV2117 (94.255)         | <i>Xp</i> group 2                  |
| F3-bs         | <i>Pf</i> Pf0-1 (89.669)    | <i>Pseudomonas</i>                 | <i>Pf</i> Pf0-1 (89.710)      | <i>Pseudomonas</i>                 | <i>Pf</i> Pf0-1 (89.675)           | <i>Pseudomonas</i>                 |
| F4-bs         | <i>Xp</i> 91-118 (94.263)   | <i>Xp</i>                          | <i>Xp</i> 91-118 (94.501)     | <i>Xp</i>                          | <i>Xp</i> 91-118 (94.369)          | <i>Xp</i>                          |
| F7-bs         | <i>Xp</i> Xp8-16 (94.464)   | <i>Xp</i> group 2                  | NA                            | NA                                 | <i>Xp</i> GEV2116 (94.360)         | <i>Xp</i> group 2                  |
| F8-bs         | <i>Xp</i> Xp10-13 (93.322)  | <i>Xp</i> group 2                  | <i>Xp</i> GEV2117 (93.271)    | <i>Xp</i> group 2                  | <i>Xp</i> Xp10-13 (93.352)         | <i>Xp</i> group 2                  |
| BAV6163       | <i>Xp</i> GEV1063 (99.976)  | <i>Xp</i> group 2                  |                               |                                    |                                    |                                    |
| BAV6164       | <i>Xp</i> GEV1063 (99.98)   | <i>Xp</i> group 2                  |                               |                                    |                                    |                                    |

791 *Ps* = *Pseudomonas syringae*    *Pf* = *Pseudomonas fluorescens*    *Pc* = *Pseudomonas congelans*    *Xp* = *Xanthomonas perforans*

792 NA – Not available, second contig too short for identification

793 **Supplementary Tables**

794 **Supplementary Table 1.** List of genomes used in the custom database.

795 **Supplementary Table 2.** Relative abundance values at the species level for all samples  
796 obtained with WIMP, Sourmash, and MetaMaps.

797 **Supplementary Table 3.** Example run times for WIMP, Sourmash, and MetaMaps.

798

799 **Figure legends**

800 **Figure 1.** Diseased tomato plants (A) Symptoms caused by *Pseudomonas syringae* pv *tomato*  
801 isolate K40 (strain *Pto* T1) in a laboratory-inoculation assay and (B) Bacterial spot symptoms in  
802 naturally infected plants during a disease outbreak on the Eastern Shore of Virginia.

803 **Figure 2.** Screenshot of the WIMP taxonomy assignment for sample L-K40.

804 **Figure 3.** Bar graph showing the comparison of results at the species level using the read-  
805 based programs WIMP, Sourmash and MetaMaps. Each barplot corresponds to individual lab  
806 samples used in the study. A = L-K40, B = L-mix, C = L-mock, and D = L-culture-mix. Relative  
807 abundance values are expressed as percentages of all sequences classified as bacteria.

808 **Figure 4.** Bar graph showing the comparison of results at the species level using the read-  
809 based programs WIMP, Sourmash and MetaMaps. Each barplot corresponds to individual field  
810 samples used in the study. A = F1-bs, B = F2-bs, C = F3-bs, D = F4-bs, E = F5-Septoria, F =  
811 F6-healthy, G = F7-bs and H= F8-bs. Relative abundance values are expressed as percentages  
812 of all sequences classified as bacteria.

813 **Figure 5.** Relative genome percentage abundance for each sample based on BLASTN using  
814 contigs as query against a custom genome database. All hits were filtered to e-values less than  
815 or equal to 0.01 and the longest hit for each contig was considered to be the best hit.

816

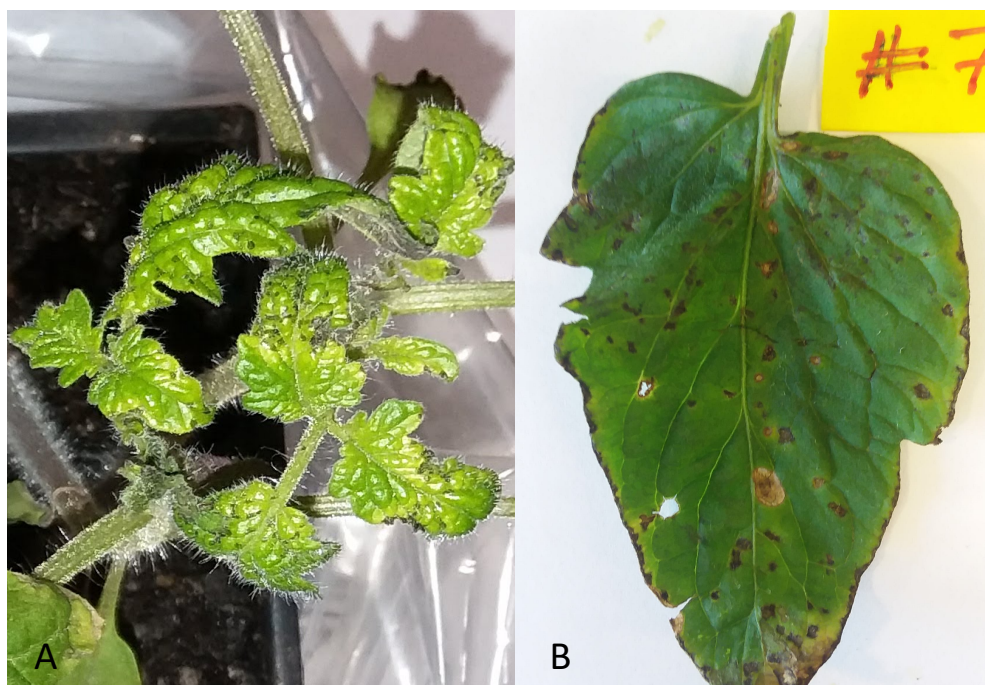

**Figure 1. Diseased tomato plants (A) Symptoms caused by *Pseudomonas syringae* pv tomato isolate K40 (strain Pto T1) in a laboratory-inoculation assay and (B) Bacterial spot symptoms in naturally infected plants during a disease outbreak on the Eastern Shore of Virginia.**

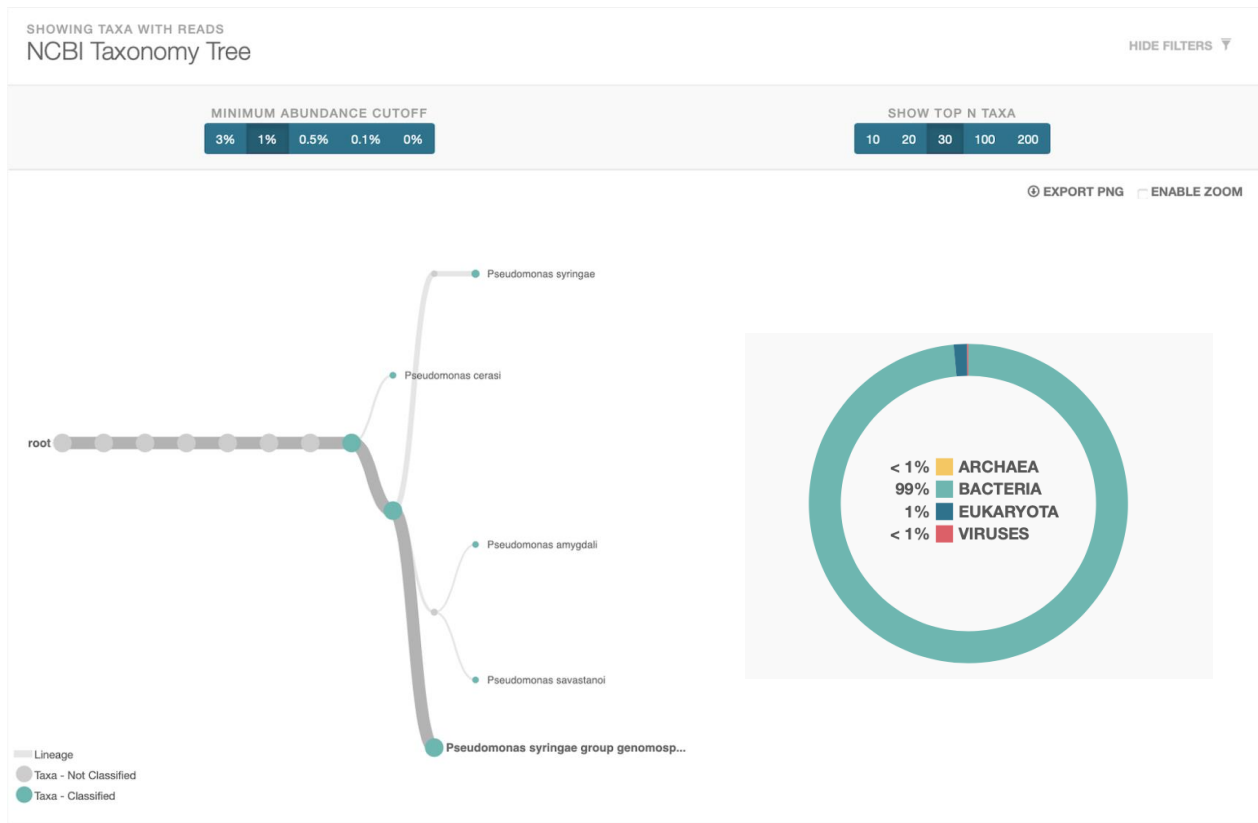

Figure 2. Screenshot of the WIMP taxonomy assignment for sample L-K40.



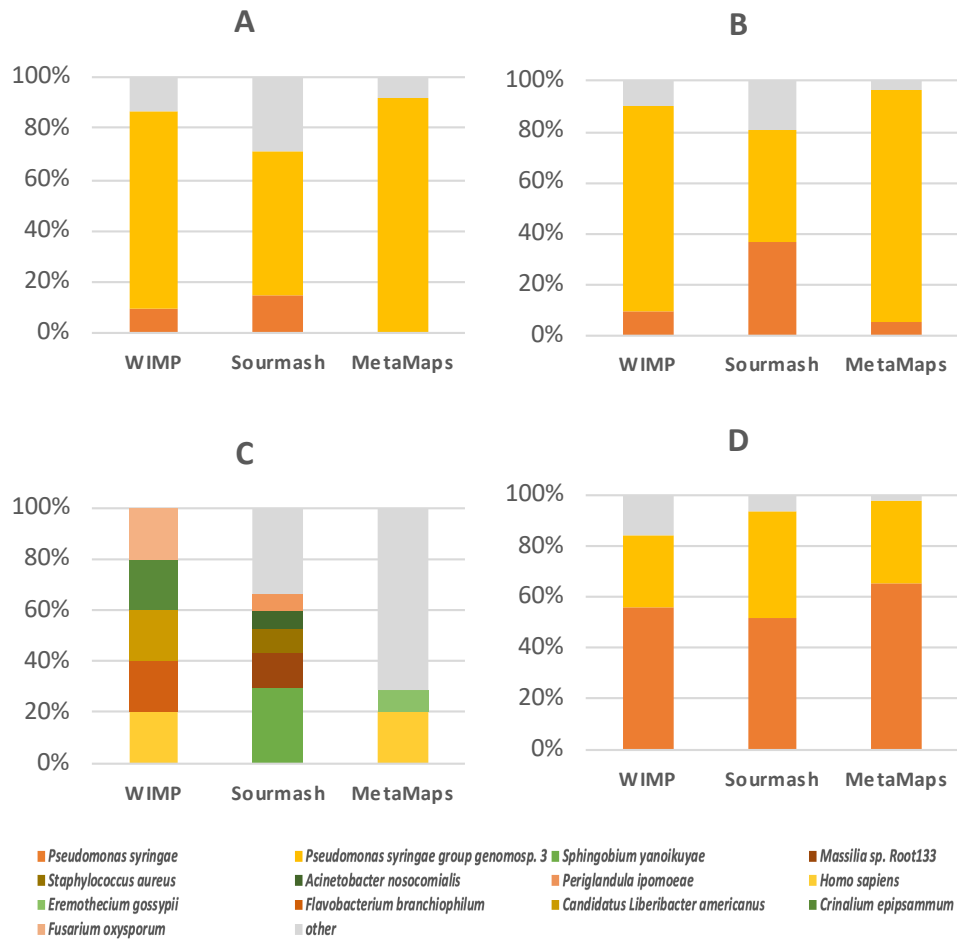

**Figure 3. Bar graph showing the comparison of results at the species level using the read-based programs WIMP, Sourmash and MetaMaps. Each barplot corresponds to individual lab samples used in the study. A = L-K40, B = L-mix, C = L-mock, and D = L-culture-mix. Relative abundance values are expressed as percentages of all sequences classified as bacteria.**

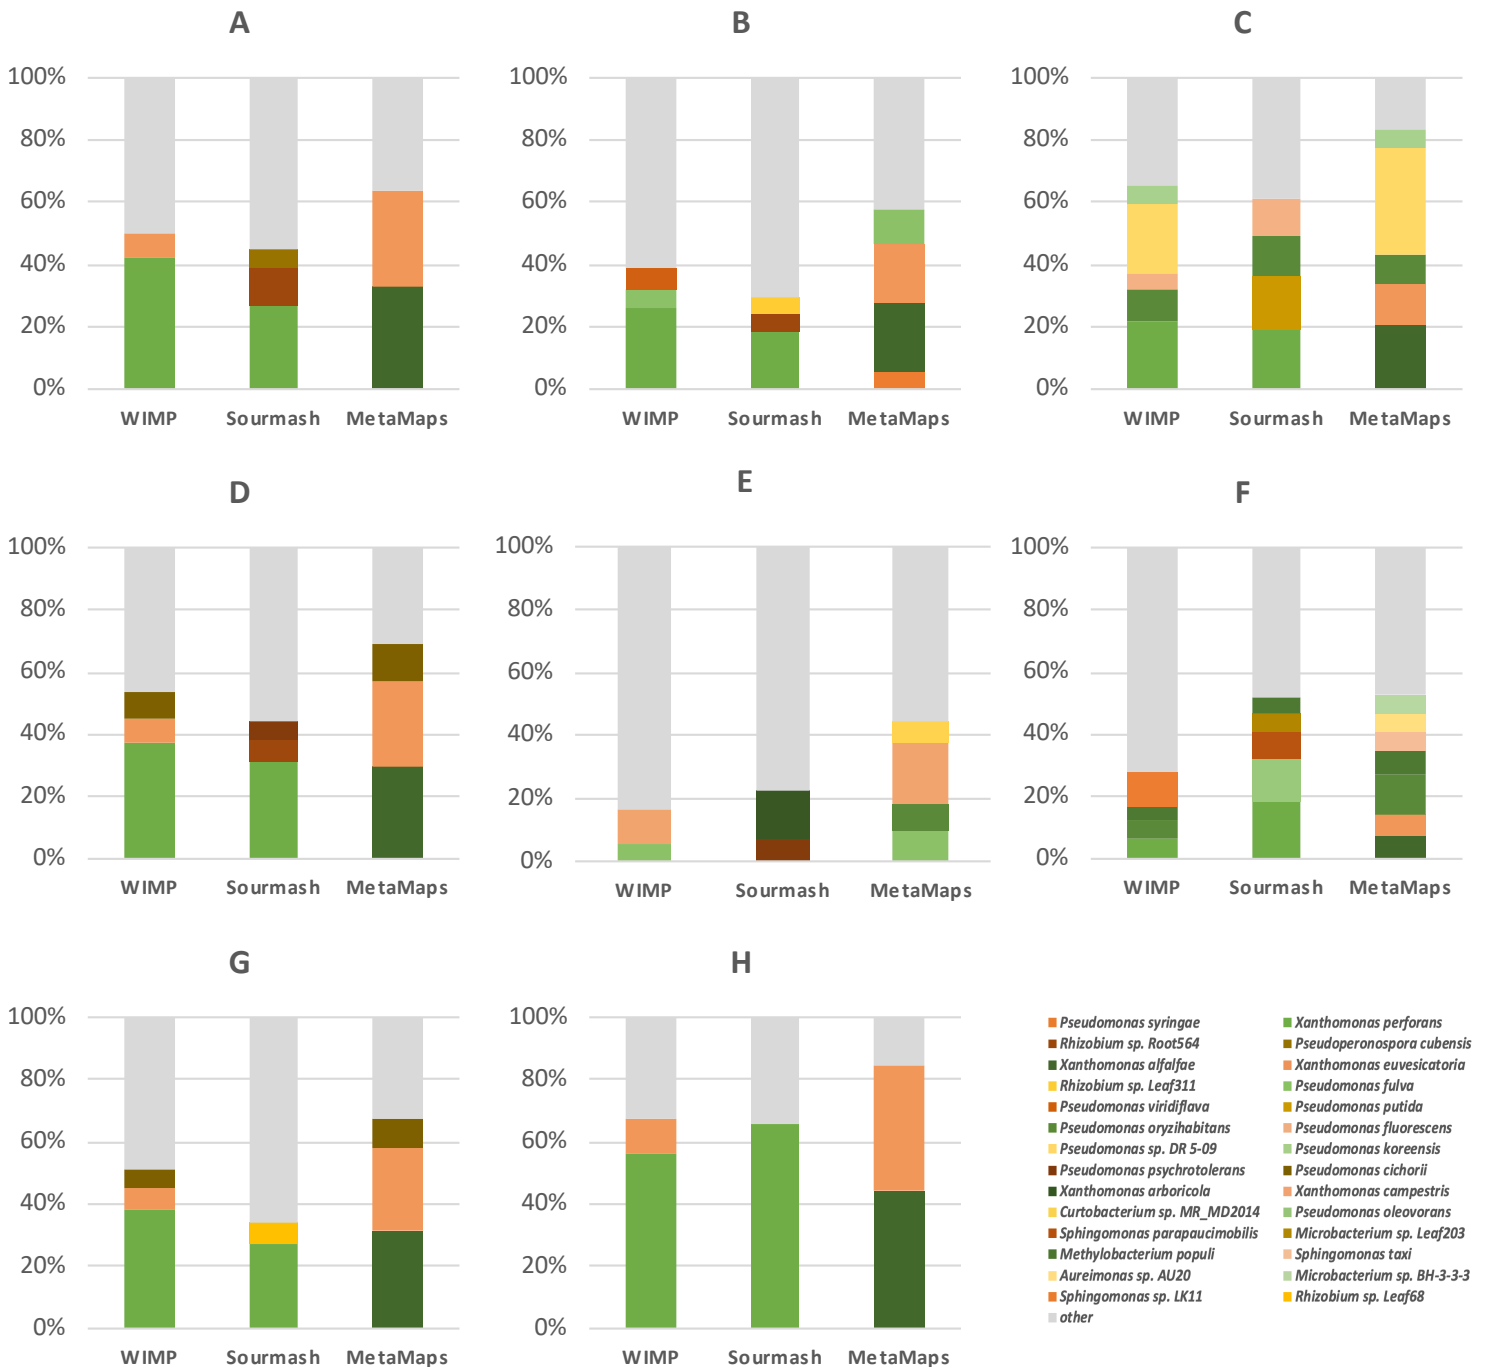

**Figure 4.** Bar graph showing the comparison of results at the species level using the read-based programs WIMP, Sourmash and MetaMaps. Each barplot corresponds to individual field samples used in the study. A = F1-bs, B = F2-bs, C = F3-bs, D = F4-bs, E = F5-Septoria, F = F6-healthy, G = F7-bs and H= F8-bs. Relative abundance values are expressed as percentages of all sequences classified as bacteria.

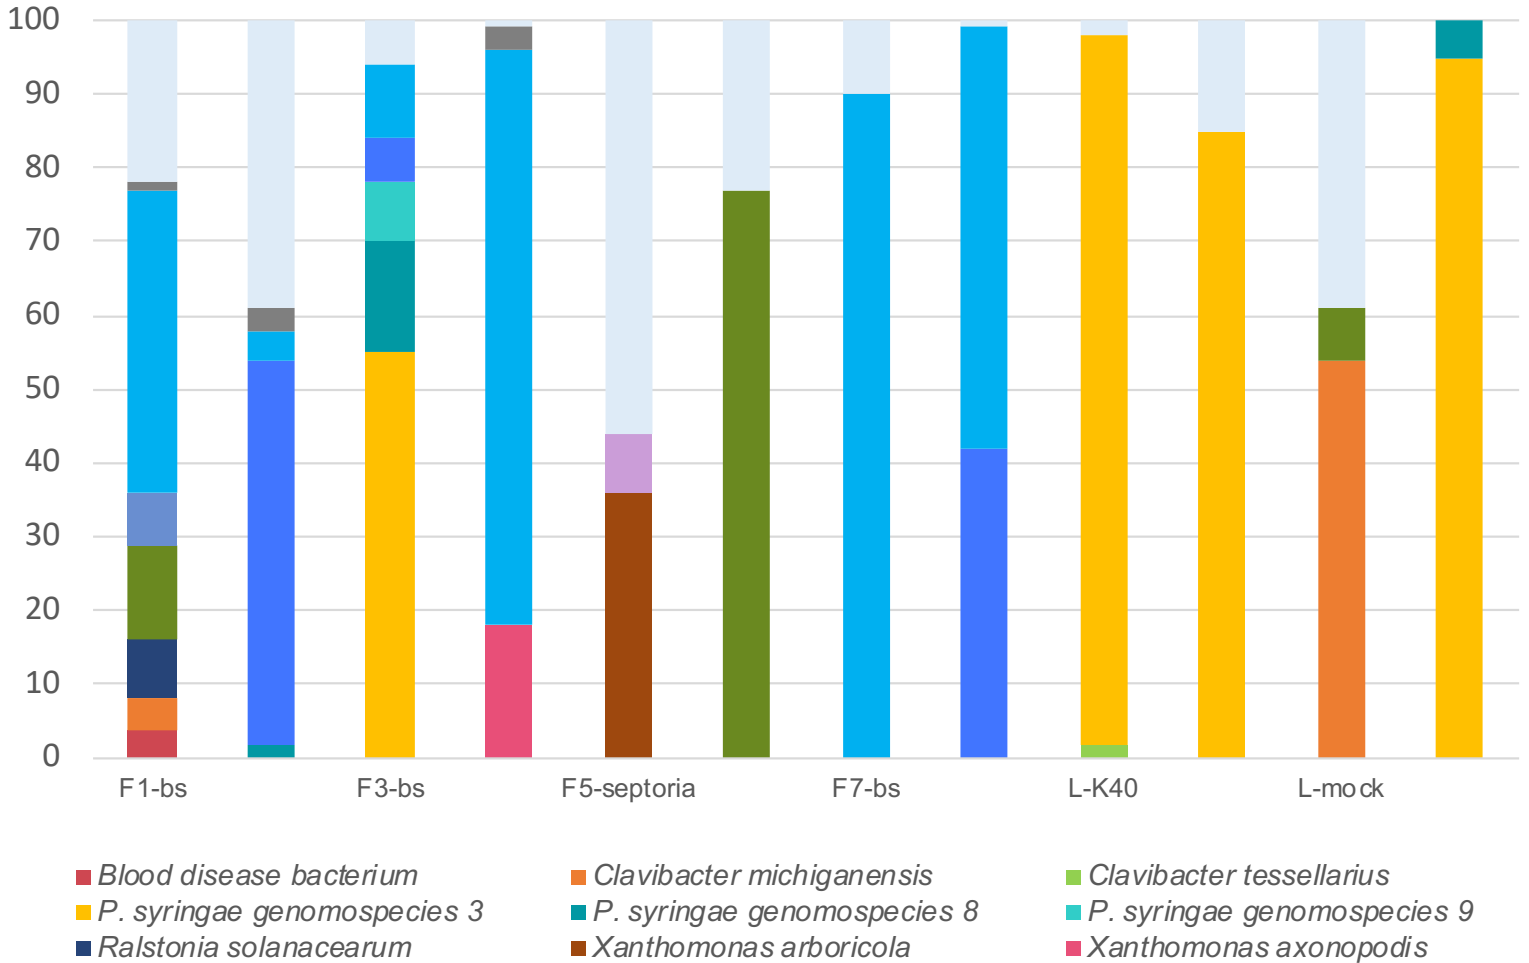

**Figure 5. Relative genome percentage abundance for each sample based on BLASTN using contigs as query against a custom genome database. All hits were filtered to e-values less than or equal to 0.01 and the longest hit for each contig was considered to be the best hit.**
